# Supplementary material for: Comparing biparametric to multiparametric MRI in the diagnosis of clinically significant prostate cancer in biopsy-naive men (PRIME): a prospective, international, multicentre, non-inferiority within-patient, diagnostic yield trial protocol
Source: HighWire-hosted journal article supplement (doi:10.1136/bmjopen-2022-070280), 2023-04-01
Supplement: bmjopen-2022-070280supp002_data_supplement.pdf [file bmjopen-2022-070280supp002_data_supplement.pdf]

## Supplementary Appendix 2: Detailed PRIME Biopsy Plans

To be pragmatic and allow results to be generalisable to biopsy practice around the world, biopsies can be performed transperineally (**Figures 1 and 2**) or transrectally (**Figures 3 and 4**) as per local practice. We split this Appendix into these sections, respectively.

If there is an MRI lesion (scores 3, 4 or 5 on *either* Likert or PI-RADS v2.1 scoring systems), then MRI-targeted biopsy and some limited contralateral systematic biopsy should be performed. MRI-targeted biopsy should be performed **first**, with 4 cores per suspicious area. Then the systematic biopsy cores should be taken but avoid taking biopsies from the same side of the prostate that targeted biopsies were taken from.

## Table of Contents

|                                                                                  |    |
|----------------------------------------------------------------------------------|----|
| Systematic Transperineal Biopsy Schema.....                                      | 2  |
| Non-suspicious MRI but a PSA Density of $\geq 0.15\text{ng/mL/mL}$ scenario..... | 2  |
| Suspicious MRI lesion scenarios.....                                             | 4  |
| <i>Single lesion scenario</i> .....                                              | 4  |
| <i>Bilateral lesions scenario</i> .....                                          | 4  |
| <i>Lesion crossing midline scenario</i> .....                                    | 5  |
| <i>Bilateral diffuse change on Likert scoring scenario</i> .....                 | 5  |
| <i>New lesion is revealed on DCE sequence scenario</i> .....                     | 6  |
| <i>New part of existing lesion is revealed on DCE sequence scenario</i> .....    | 6  |
| Systematic Transrectal Biopsy Schema.....                                        | 7  |
| Non-suspicious MRI but a PSA Density of $\geq 0.15\text{ng/mL/mL}$ scenario..... | 7  |
| Suspicious MRI lesion scenarios.....                                             | 9  |
| <i>Single lesion scenario</i> .....                                              | 9  |
| <i>Bilateral lesions scenario</i> .....                                          | 10 |
| <i>Lesion crossing midline scenario</i> .....                                    | 11 |
| <i>Bilateral diffuse change on Likert scoring scenario</i> .....                 | 12 |
| <i>New lesion is revealed on DCE sequence scenario</i> .....                     | 13 |
| <i>New part of existing lesion is revealed on DCE sequence scenario</i> .....    | 14 |
| Summary Biopsy Guidelines.....                                                   | 16 |

## Systematic Transperineal Biopsy Schema

**Figures 1** and **2A-F** depict examples of how to perform the systematic biopsy in the **absence** of an MRI lesion and in the **presence** of MRI lesions, respectively.

### Non-suspicious MRI but a PSA Density of $\geq 0.15\text{ng/mL/mL}$ scenario

In patients with a **non-suspicious MRI but a PSA Density of  $\geq 0.15\text{ng/mL/mL}$** , 12-core systematic biopsy should be performed (**Figure 1**).

The number of systematic cores that should be taken per patient is **12**.

Systematic biopsy cores are taken from:

- Right anterior zone (2 cores)
- Right mid zone (2 cores)
- Right posterior zone (2 cores)
- Left anterior zone (2 cores)
- Left mid zone (2 cores)
- Left posterior zone (2 cores)

Systematic biopsy cores should be stored and labelled in a way that their **location** can be identified when the pathologist reports the result.

**Figure 1.** The transperineal biopsy schema for men with a **non-suspicious MRI** (scores 1 or 2 on both Likert and PI-RADS v2.1 scoring systems) *but* a PSA Density of  $\geq 0.15\text{ng/mL/mL}$ , undergoing 12-core systematic biopsy.

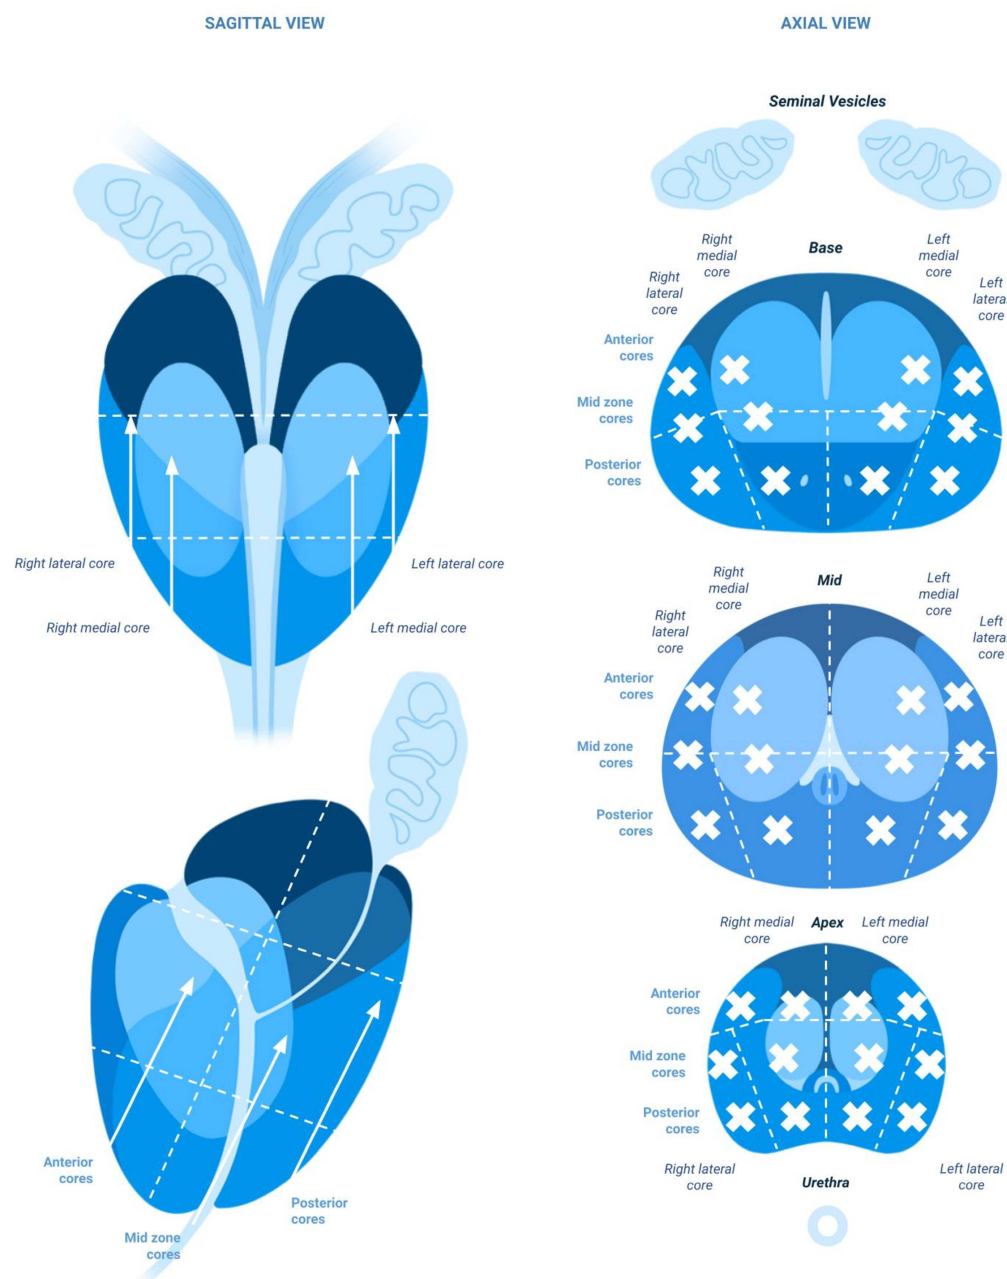

For each pair of biopsies – one core is more lateral, one core is more medial. From anterior—posterior, there are 3 planned rows of biopsies – anterior, mid zone, posterior. Avoid biopsy around the urethra.

### Suspicious MRI lesion scenarios

**Figure 2.** Examples of how to perform transperineal biopsies in patients with an MRI Target (scores 3, 4 or 5 on *either* Likert or PI-RADS v2.1 scoring systems).

#### 2A. Single lesion example.

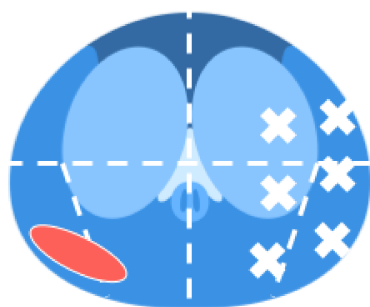

This is a single lesion in the right mid-gland peripheral zone posteromedially (PZ pm) and posterolaterally (PZ pl).

- Take **4 targeted biopsies** from the Target.
- Then take **6 peripheral zone focused biopsies** from the **contralateral** side.
- Do **not** resample the targeted biopsy side.

#### 2B. Bilateral peripheral zone lesions example.

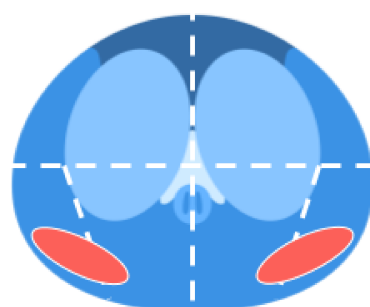

There are **two lesions**: one in right mid-gland, peripheral zone posteromedially and posterolaterally (PZ pm and PZ pl); one in left mid-gland, peripheral zone posteromedially and posterolaterally (PZ pm and PZ pl).

- Take **4 targeted biopsies** from **each** Target – *i.e.* **8 targeted biopsies** in **total**.
- **Do not take any systematic biopsies** as targeted biopsies are taken from both sides of the prostate.



**2C.** Lesion crossing midline example.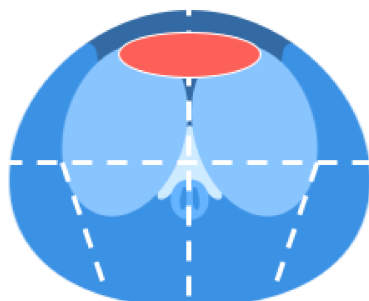

This is one lesion crossing the midline in the mid-gland, anterior fibromuscular stroma.

- Take **4 targeted biopsies** from the Target.
- **Do not take any systematic biopsies** as targeted biopsies are taken from both sides of the prostate.

**2D.** Bilateral diffuse change on Likert scoring example.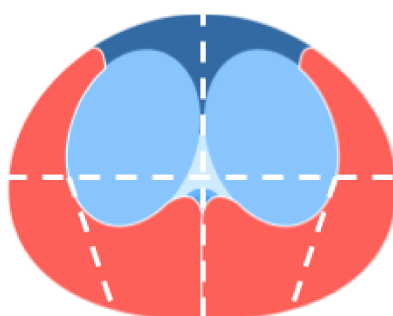

In the circumstance where on Likert scoring, the peripheral zone gives diffuse change, scoring 3 out of 5, arbitrarily **treat each peripheral zone** as a **different Target**.

- Take **4 targeted biopsies** from *each half* of the peripheral zone – *i.e. 8 biopsies* in total.
- **Do not take any systematic biopsies** as targeted biopsies are taken from both sides of the prostate.

**2E.** A new lesion is revealed on DCE sequence example.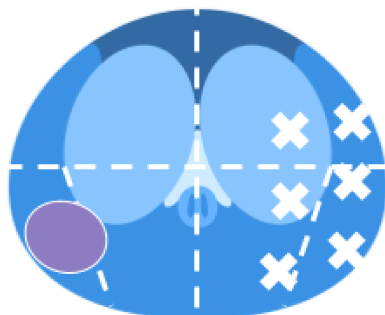

This is one lesion in the right mid-gland, peripheral zone posterolaterally. This **new Target** was specifically *not* suspicious (scored 1 or 2 on both Likert and PI-RADS v2.1) on bpMRI sequences (T2W and DWI). However, when the contrast sequence is revealed, the lesion appears to be suspicious (scored 3, 4 or 5 on Likert) on the dynamic contrast-enhanced (DCE) sequence than on the bpMRI.

- Thus, label the **new lesion** as a **DCE-Target**.
- Take **4 targeted biopsies** from **DCE-Target-1**.
- Then take **6 peripheral zone focused biopsies** from the **contralateral** side of the prostate.
- Do **not** resample the targeted biopsy side.

**2F.** A new **part** of an *existing* lesion is revealed on DCE sequence example.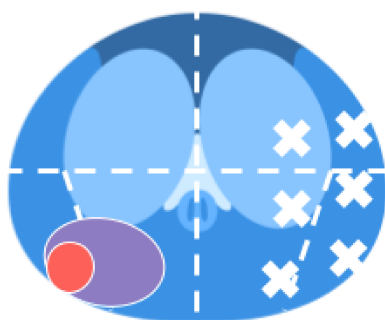

There are two lesions in this example. **Target 1 (red)** was suspicious on **both** bpMRI and mpMRI. It is in the right mid-gland, peripheral zone, posterolaterally (PZ pl). It scores Likert 4 and PI-RADS v2.1 4.

However, when the contrast sequence is revealed, this lesion appears to be larger on the DCE sequence than on bpMRI. The part of the lesion that is **non-overlapping** would **not** have been

target biopsied if bpMRI alone was used. Thus, the second lesion (the non-overlapping part, **purple**) is called **DCE Target 1**. It is in the right mid-gland, peripheral zone, posteromedially (PZ pm).

Thus, the instructions are as follows in this instance:

- Take **4 targeted biopsies** from **Target 1**.
- Take **4 targeted biopsies** from **DCE Target 1**.
- Take **6 peripheral zone focused biopsies** from the **contralateral** side of the prostate.
- Do **not** resample the targeted biopsy side.

## Systematic Transrectal Biopsy Schema

**Figures 3** and **4** depict examples of how to perform the systematic biopsy in the **absence** of an MRI lesion and in the **presence** of MRI lesions, respectively.

### Non-suspicious MRI but a PSA Density of $\geq 0.15\text{ng/mL/mL}$ scenario

In patients with a **non-suspicious MRI but a PSA Density of  $\geq 0.15\text{ng/mL/mL}$** , 12-core systematic biopsy should be performed (**Figure 3**).

If performing biopsies transrectally, systematic biopsy cores should be taken from:

- Right base (2 cores)
- Right mid gland (2 cores)
- Right apex (2 cores)
- Left base (2 cores)
- Left mid gland (2 cores)
- Left apex (2 cores)

Systematic biopsy cores should be stored and labelled in a way that their location can be identified when the pathologist reports the result.

The 12 systematic biopsies **should be focused on the peripheral zone**. The urethra should be avoided.

**Figure 3.** The transrectal biopsy schema for men with a **non-suspicious MRI** (scores 1 or 2 on both Likert and PI-RADS v2.1 scoring systems) *but* a PSA Density of  $\geq 0.15\text{ng/mL/mL}$ , undergoing 12-core systematic biopsy.

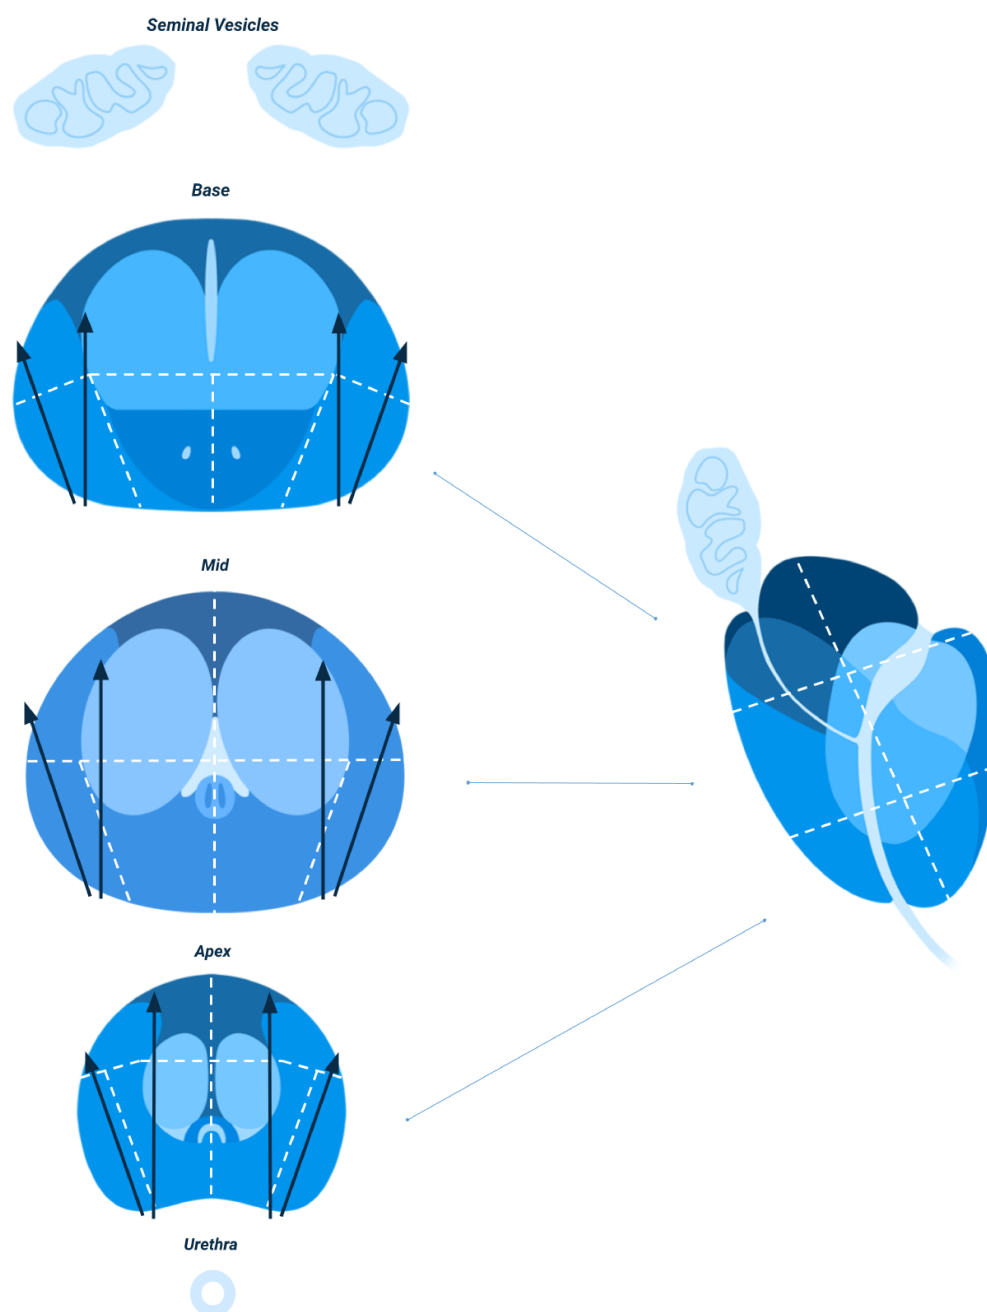

## Suspicious MRI lesion scenarios

**Figure 4.** Examples of how to perform transrectal biopsies in patients with an MRI Target (scores 3, 4 or 5 on *either* Likert or PI-RADS v2.1 scoring systems).

**4A.** Single lesion example.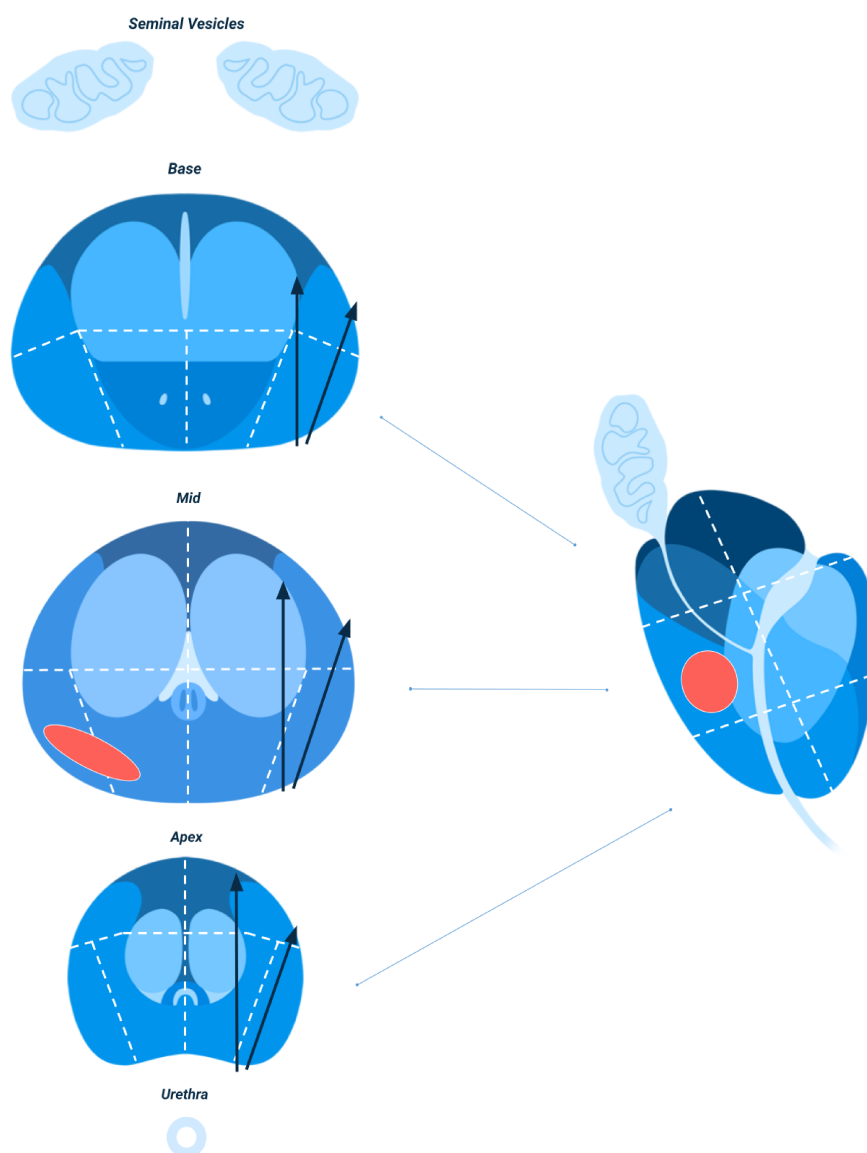

This is a single lesion in the right mid-gland peripheral zone posteromedially (PZ pm) and posterolaterally (PZ pl).

- Take **4 targeted biopsies** from the Target.
- Then take **6 peripheral zone focused biopsies** from the **contralateral** side.

Designed by Aqua Asif

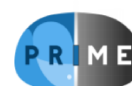

- Do **not** resample the targeted biopsy side.

#### 4B. Bilateral peripheral zone lesions example.

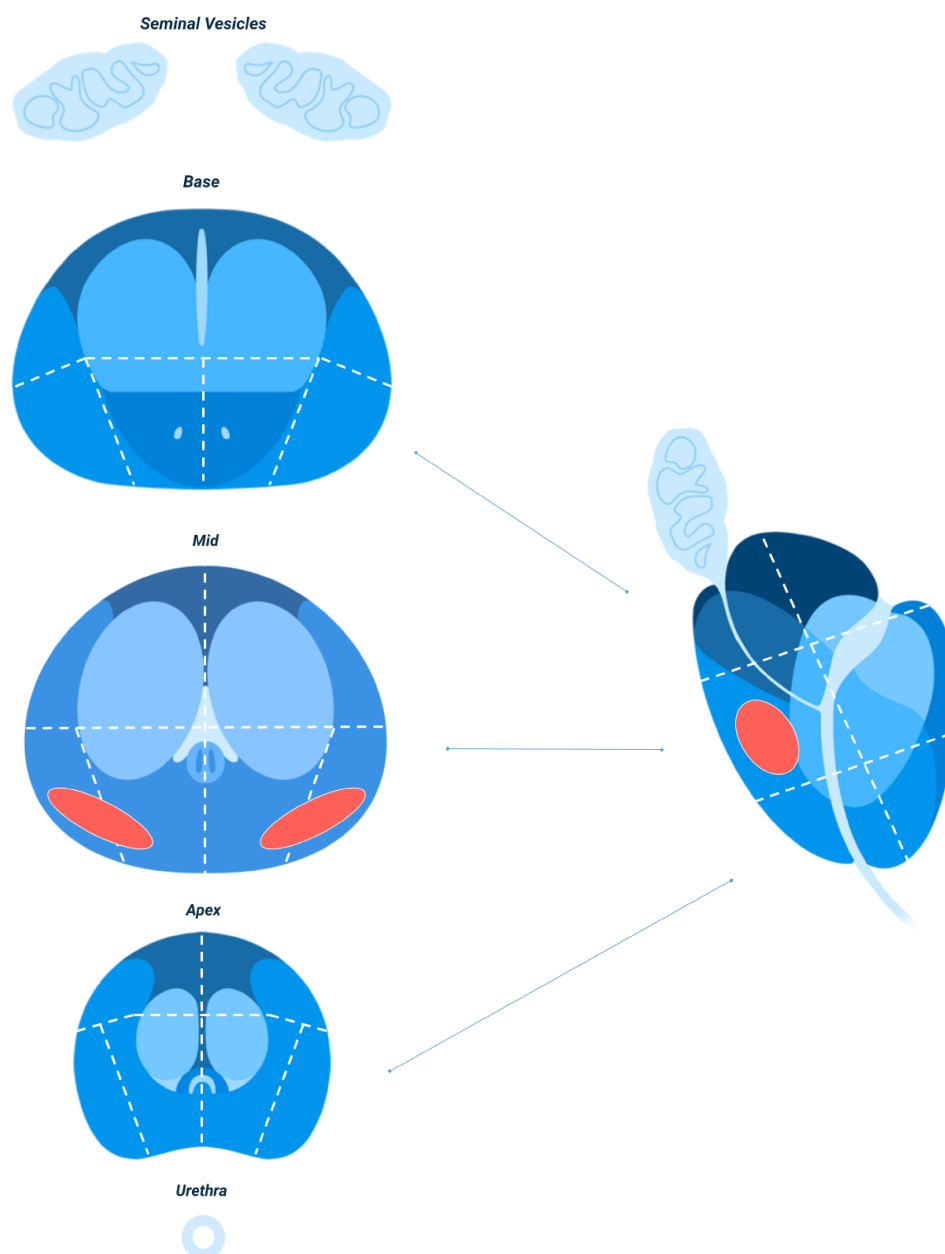

There are **two lesions**: one in right mid-gland, peripheral zone posteromedially and posterolaterally (PZ pm and PZ pl); one in left mid-gland, peripheral zone posteromedially and posterolaterally (PZ pm and PZ pl).

- Take **4 targeted biopsies** from **each** Target – *i.e.* **8 targeted biopsies** in **total**.

- **Do not take any systematic biopsies** as targeted biopsies are taken from both sides of the prostate.

**4C.** Lesion crossing midline example.

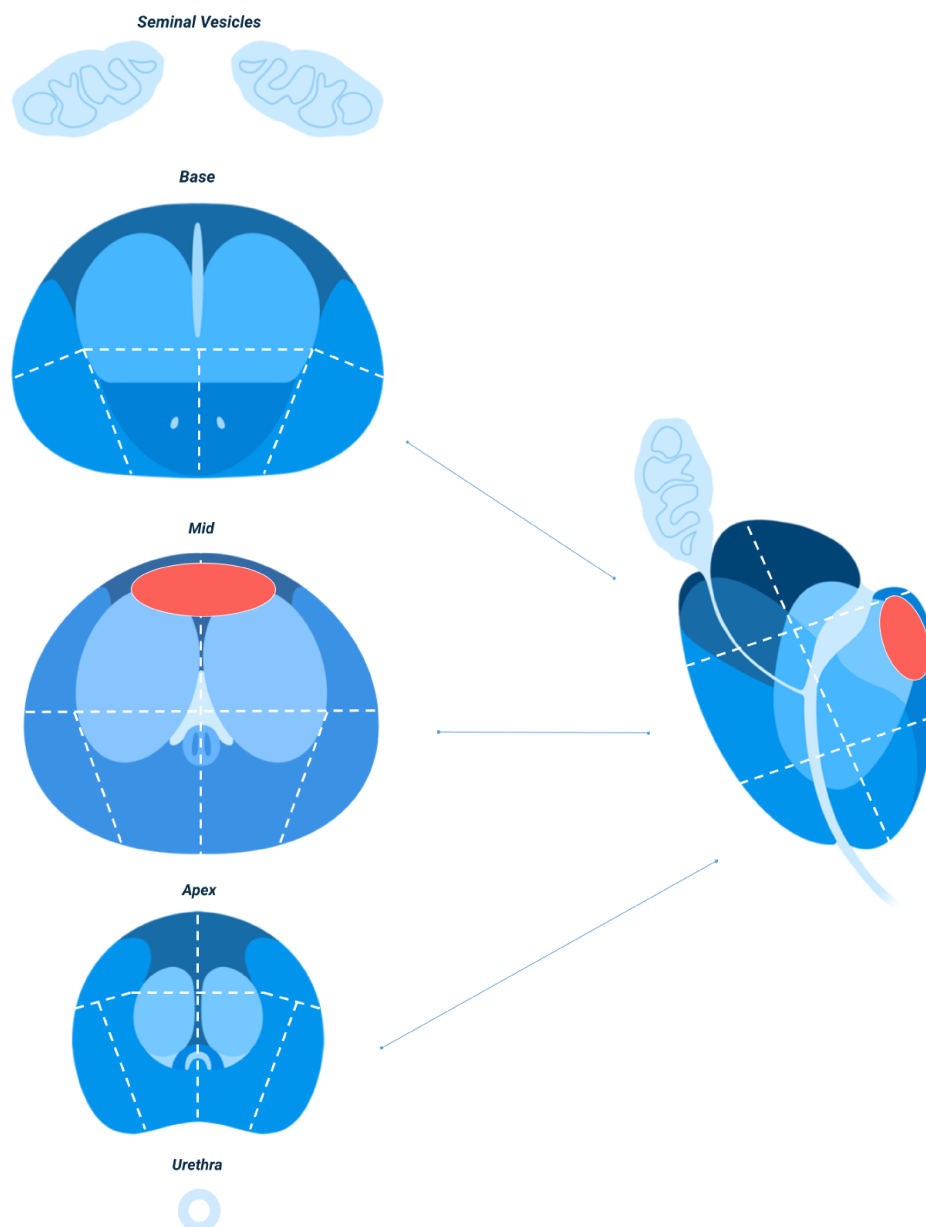

This is one lesion crossing the midline in the mid-gland, anterior fibromuscular stroma.

- Take **4 targeted biopsies** from the Target.

- **Do not take any systematic biopsies** as targeted biopsies are taken from both sides of the prostate.

**4D.** Bilateral diffuse change on Likert scoring example.

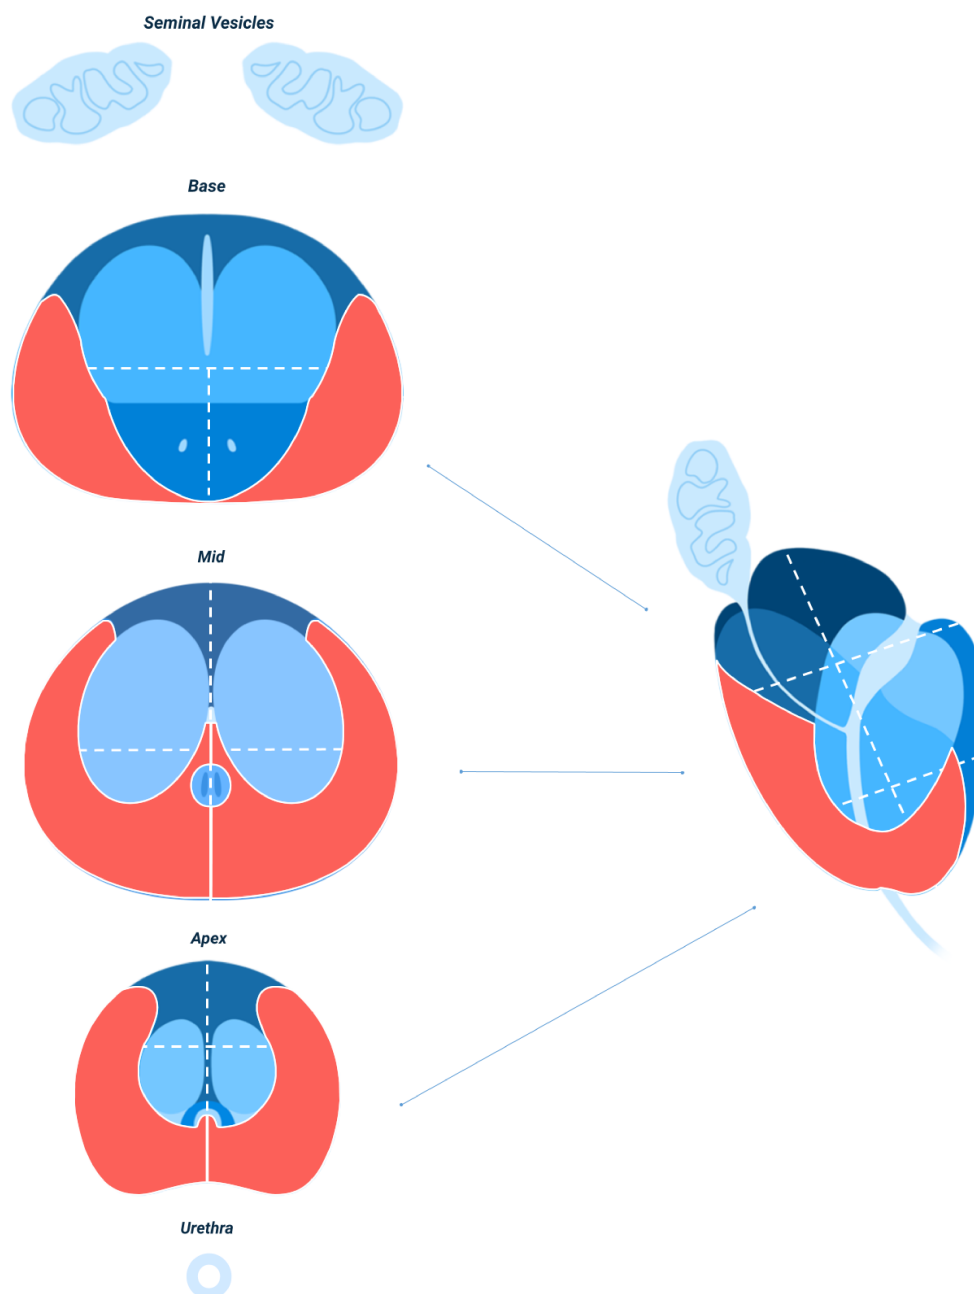

In the circumstance where on Likert scoring, the peripheral zone gives diffuse change, scoring 3 out of 5, arbitrarily **treat each peripheral zone as a different Target.**



- Take **4 targeted biopsies** from *each half* of the peripheral zone – *i.e.* **8 biopsies** in total.
- **Do not take any systematic biopsies** as targeted biopsies are taken from both sides of the prostate.

**4E.** A new lesion is revealed on DCE sequence example.

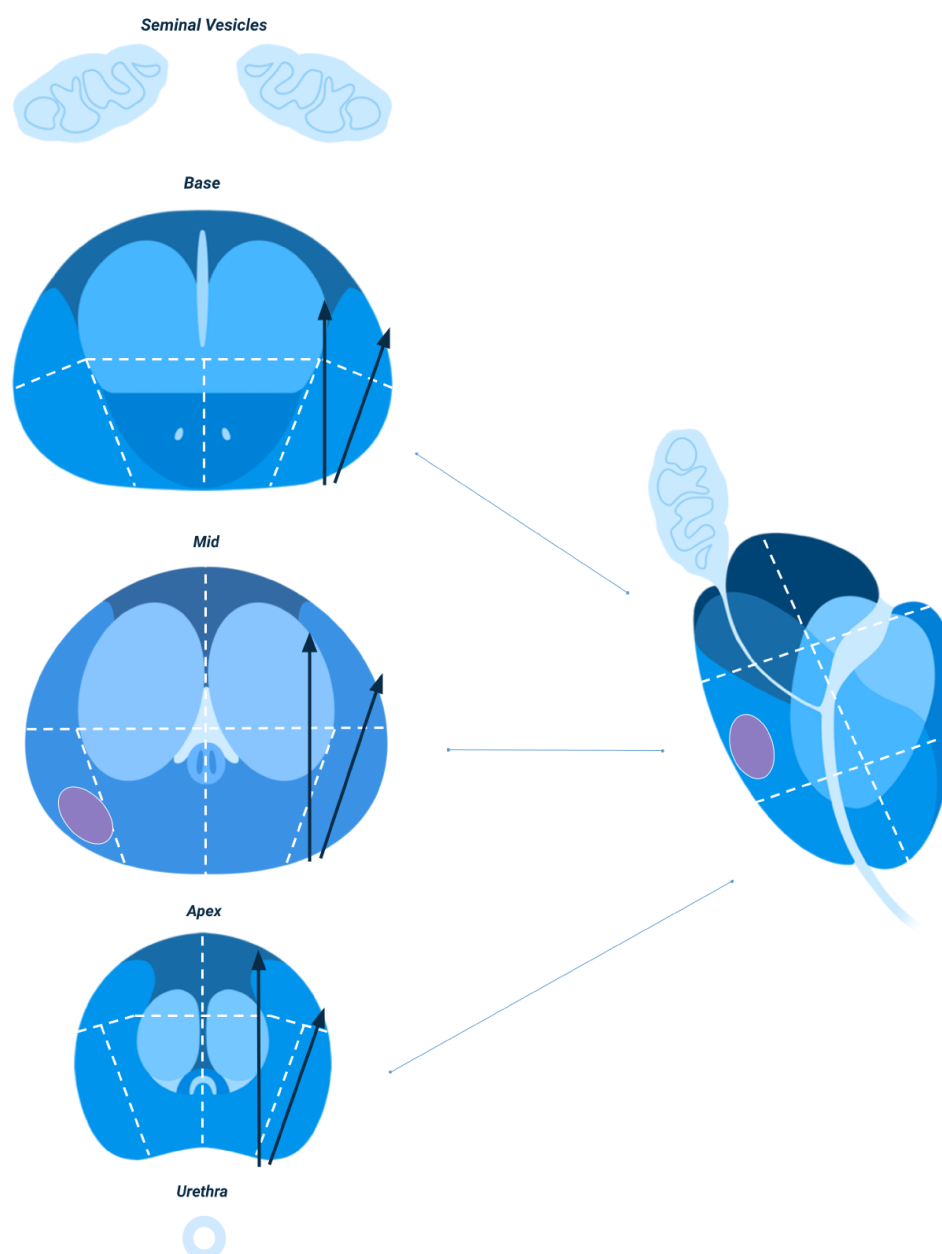

This is one lesion in the right mid-gland, peripheral zone posterolaterally. This **new Target** was specifically *not* suspicious (scored 1 or 2 on both Likert and PI-RADS v2.1) on bpMRI sequences (T2W and DWI). However, when the contrast sequence is revealed, the lesion

appears to be suspicious (scored 3, 4 or 5 on Likert) on the dynamic contrast-enhanced (DCE) sequence than on the bpMRI.

- Thus, label the **new lesion** as a **DCE-Target**.
- Take **4 targeted biopsies** from **DCE-Target-1**.
- Then take **6 peripheral zone focused biopsies** from the **contralateral** side of the prostate.
- Do **not** resample the targeted biopsy side.

**4F.** A new **part** of an *existing* lesion is revealed on DCE sequence example.

There are two lesions in this example. **Target 1 (red)** was suspicious on **both** bpMRI and mpMRI. It is in the right mid-gland, peripheral zone, posterolaterally (PZ pl). It scores Likert 4 and PI-RADS v2.1 4.

However, when the contrast sequence is revealed, this lesion appears to be larger on the DCE sequence than on bpMRI. The part of the lesion that is **non-overlapping** would **not** have been target biopsied if bpMRI alone was used. Thus, the second lesion (the non-overlapping part, **purple**) is called **DCE Target 1**. It is in the right mid-gland, peripheral zone, posteromedially (PZ pm).

Thus, the instructions are as follows in this instance:

- Take **4 targeted biopsies** from **Target 1**.
- Take **4 targeted biopsies** from **DCE Target 1**.
- Take **6 peripheral zone focused biopsies** from the **contralateral** side of the prostate.
- Do **not** resample the targeted biopsy side.

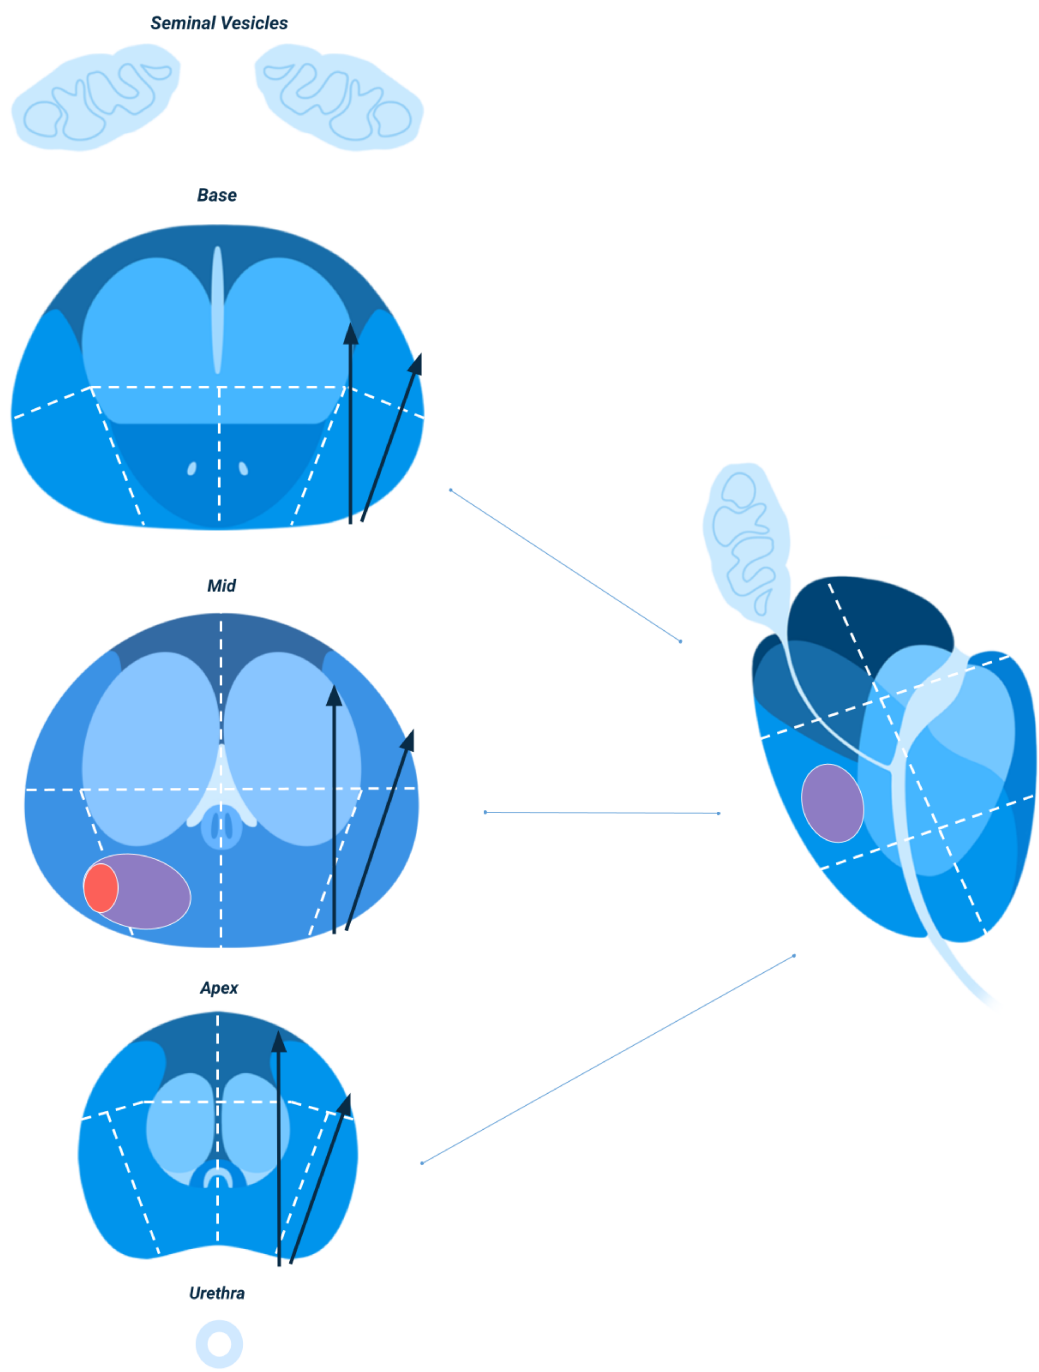

Designed by Aqua Asif

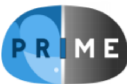

## Summary Biopsy Guidelines

| Number of MRI targets | Location of MRI targets in prostate                                                                 | Number of MRI-targeted biopsy cores | Number of contralateral systematic cores | Total number of biopsy cores |
|-----------------------|-----------------------------------------------------------------------------------------------------|-------------------------------------|------------------------------------------|------------------------------|
| 0                     | If PSA Density is < 0.15ng/ml/ml                                                                    |                                     |                                          | 0                            |
| 0                     | If PSA Density is $\geq$ 0.15ng/ml/ml, then 12 systematic biopsy cores are taken (6 from each side) |                                     |                                          | 12                           |
| 1                     | Unilateral                                                                                          | 4                                   | 6                                        | 10                           |
| 2                     | Unilateral                                                                                          | 8                                   | 6                                        | 14                           |
| 3                     | Unilateral                                                                                          | 12                                  | 6                                        | 18                           |
| 4–8                   | Unilateral                                                                                          | 16–32                               | 6                                        | 22–38                        |
| 1                     | Bilateral (e.g. crossing midline)                                                                   | 4                                   | 0                                        | 4                            |
| 2                     | Bilateral                                                                                           | 8                                   | 0                                        | 8                            |
| 3                     | Bilateral                                                                                           | 12                                  | 0                                        | 12                           |
| 4–8                   | Bilateral                                                                                           | 16–32                               | 0                                        | 16–32                        |
